# Supplementary material for: Molecular and agro-morphological diversity assessment of some bread wheat genotypes and their crosses for drought tolerance
Source: PeerJ. 2024 Sep 26;12:e18104. doi: 10.7717/peerj.18104 (PMC11439381; doi:10.7717/peerj.18104)
Supplement: Supplemental Information 1 [file peerj-12-18104-s001.xlsx]

## Sheet: Data
Irrigation	Genotype	Replication	Shoot fresh weight (g)	Shoot dry weight (g)	Root fresh weight (g)	Root dry weight (g)	Shoot length (cm)	Root length (cm)	Proline content	Spike length (cm)	Spikelet number per spike	Grain number per spike	Grain weight per spike (g)
Well-watered	P1	1	13.05	2.717	4.214	0.585	66.5	11.9444	6.348	7	22	42	1.68
Well-watered	P2	1	7.4	1.664	2.4892	0.53	58.8	10.5556	3.348	8	20	36	1.8
Well-watered	P3	1	10.7	2.353	3.5672	0.59	62.44	11.6111	16.038	10.5	25	50	2.35
Well-watered	P4	1	7.625	1.781	2.8224	0.615	45.5	6.66667	6.555	9	23	43	2.107
Well-watered	P5	1	9.675	2.09	3.626	0.635	44.52	7.22222	12.48	8.5	23	45	1.35
Well-watered	P1×P2	1	7.55	2.184	3.3516	0.5575	62.636	11.2222	3.348	7.5	20	40	1.84
Well-watered	P1×P3	1	11.875	2.535	3.8906	0.5875	64.4	11.7778	6.69	9.5	22	46	1.7
Well-watered	P1×P4	1	7.125	1.898	2.9204	0.54	48.3	10	6.51	9	23	47	2.1902
Well-watered	P1×P5	1	4.8	1.56	2.3716	0.52	37.1	5.16667	3.36	7.5	20	35	1.75
Well-watered	P2×P3	1	9.1	2.015	3.0184	0.56	60.62	11.1111	8.55	11	23	39	2.145
Well-watered	P2×P4	1	7.5	1.729	2.646	0.5725	52.15	8.33333	4.29	9	22	40	2
Well-watered	P2×P5	1	6.575	1.885	3.0576	0.5825	51.66	8.88889	7.914	8.5	21	40	1.72
Well-watered	P3×P4	1	7.2	1.976	2.842	0.548	46.9	6.11111	6.81	10	24	49	2.352
Well-watered	P3×P5	1	8.175	2.236	3.5868	0.6125	53.48	9.38889	4.479	10.5	24	45	1.89
Well-watered	P4×P5	1	6	1.82	2.45	0.525	40.74	8.05556	4.74	8.5	22	41	2.05
Well-watered	P1	2	13.15	2.626	3.0576	0.645	77	11.8889	6.663	6	21	43	1.72
Well-watered	P2	2	7.6	1.742	2.646	0.52	50.4	10	3.96	9	22	37	1.85
Well-watered	P3	2	11.625	2.418	3.1948	0.56	57.12	11.2222	11.94	11	24	45	2.115
Well-watered	P4	2	6.325	1.976	3.2928	0.5435	41.72	9.83333	10.14	8.5	22	44	2.156
Well-watered	P5	2	7.425	1.935	4.508	0.59	51.1	7.38889	10.68	9.5	22	45	1.35
Well-watered	P1×P2	2	10.25	2.184	2.8616	0.583	63.7	10.9444	6.81	8	21	39	1.794
Well-watered	P1×P3	2	12.375	2.522	3.1262	0.6025	69.86	11.5556	10.8	9	24	45	1.935
Well-watered	P1×P4	2	7	1.846	2.8224	0.535	46.76	9.72222	6.75	8.5	22	48	2.2368
Well-watered	P1×P5	2	4.7	1.586	2.45	0.525	36.82	5	7.41	8	19	34	1.7
Well-watered	P2×P3	2	9.5	2.08	2.9204	0.54	53.76	10.5556	6.699	12	21	38	2.09
Well-watered	P2×P4	2	6.875	1.859	2.9204	0.5325	46.06	9.72222	8.55	9	22	43	2.15
Well-watered	P2×P5	2	8.45	1.677	3.5868	0.555	50.75	8.66667	7.32	9.5	20	39	1.68
Well-watered	P3×P4	2	9.65	1.937	2.3128	0.516	55.02	9.16667	6.15	10.5	23	46	2.208
Well-watered	P3×P5	2	10.55	2.015	3.8416	0.575	54.04	9.22222	8.1	10.5	23	47	1.974
Well-watered	P4×P5	2	7.45	1.859	2.352	0.53	46.9	8.88889	5.67	9	21	45	2.25
Well-watered	P1	3	13.1	2.665	3.626	0.615	71.75	11.8889	6.504	8	23	44	1.76
Well-watered	P2	3	7.5	1.885	2.1952	0.512	44.8	9.55556	3.654	9	19	37	1.85
Well-watered	P3	3	10.325	2.392	3.3908	0.575	51.8	11.9444	13.626	12	23	49	2.303
Well-watered	P4	3	6.975	1.885	3.0576	0.579	49.28	8.22222	8.34	8.5	22	44	2.156
Well-watered	P5	3	8.55	1.92	3.724	0.6125	46.9	8.88889	12.3	9.5	23	42	1.26
Well-watered	P1×P2	3	10.35	2.275	2.9008	0.5635	58.275	10.7222	3.39	7.5	22	39	1.794
Well-watered	P1×P3	3	11.7	2.522	3.5084	0.595	61.782	11.8889	10.05	9	24	44	2
Well-watered	P1×P4	3	7	1.82	2.94	0.545	47.6	10.1111	6.66	8.5	23	49	2.2834
Well-watered	P1×P5	3	4.75	1.56	2.352	0.52	36.26	4.88889	8.79	8	21	38	1.9
Well-watered	P2×P3	3	8.25	1.885	2.7832	0.5435	48.3	10.7222	7.635	12	21	39	2.145
Well-watered	P2×P4	3	7.25	1.872	2.6264	0.5455	47.04	8.61111	5.97	8.5	23	41	2.05
Well-watered	P2×P5	3	7.5	1.677	2.9596	0.562	45.78	9.16667	7.98	8.5	21	40	1.72
Well-watered	P3×P4	3	8.425	2.015	2.5872	0.532	50.96	7.63889	6.48	10	24	46	2.208
Well-watered	P3×P5	3	9	2.132	3.5476	0.5935	49.28	10.2778	6.27	10.7	23	48	2.016
Well-watered	P4×P5	3	6.725	1.898	2.3912	0.52	43.82	8.44444	5.214	8.5	23	43	2.15
Drought stress	P1	1	6.325	1.562	2.016	0.54	32.04	9.44444	21.118	6.5	10	25	0.475
Drought stress	P2	1	4.475	1.309	1.6272	0.515	27.12	6.11111	24.26	6	10	25	0.5
Drought stress	P3	1	6.725	1.507	1.6272	0.5475	42.84	8.33333	17.5	9	11	22	0.462
Drought stress	P4	1	5.425	1.452	1.6272	0.534	28.68	7	22.95	5.5	11	24	0.504
Drought stress	P5	1	5.675	1.683	3.6576	0.635	38.4	12.2222	20.8	6	14	33	0.726
Drought stress	P1×P2	1	5.4	1.419	1.836	0.5275	29.52	7.77778	24.2	5.5	10	24	0.48
Drought stress	P1×P3	1	6.525	1.54	2.1024	0.545	37.44	8.05556	19.31	6.5	9	22	0.418
Drought stress	P1×P4	1	4.875	1.408	1.7424	0.53	31.8	8.05556	22.04	6.5	9	24	0.48
Drought stress	P1×P5	1	4.775	1.243	1.7136	0.5105	27.72	4.44444	21.8	6	9	23	0.483
Drought stress	P2×P3	1	6	1.496	1.8	0.519	31.44	8.33333	18.375	10	11	26	0.52
Drought stress	P2×P4	1	4.95	1.364	1.836	0.5245	27.96	6.66667	24.12	5.5	11	26	0.52
Drought stress	P2×P5	1	7.075	1.529	2.6424	0.575	32.76	8.88889	22.03	6	12	28	0.56
Drought stress	P3×P4	1	7.175	1.54	1.6272	0.5145	34.44	6.94444	20.76	8.5	11	27	0.54
Drought stress	P3×P5	1	8.2	1.65	2.88	0.5915	40.56	10	19.6	8	11	28	0.588
Drought stress	P4×P5	1	6.575	1.496	1.6416	0.5125	33.36	9.44444	21.875	6.5	10	25	0.65
Drought stress	P1	2	6.975	1.595	2.304	0.565	32.16	8.33333	19.427	6	11	22	0.528
Drought stress	P2	2	4.725	1.298	1.8864	0.52	28.8	6.66667	23.37	6	11	26	0.52
Drought stress	P3	2	6.15	1.496	2.016	0.555	37.56	8.88889	20.9	8	10	19	0.399
Drought stress	P4	2	5.775	1.419	2.1888	0.535	31.8	8.72222	20.75	5.5	11.5	27	0.567
Drought stress	P5	2	9.5	1.683	2.9664	0.624	38.88	11.1111	22.76	6	15	34	0.782
Drought stress	P1×P2	2	5.85	1.43	2.0952	0.5425	30.48	7.5	19.9	5.5	10	25	0.5
Drought stress	P1×P3	2	6.575	1.529	2.16	0.56	34.8	8.66667	20.16	7	9.5	24	0.552
Drought stress	P1×P4	2	4.775	1.386	1.7568	0.525	31.32	7.77778	20.09	6	10	23	0.46
Drought stress	P1×P5	2	4.25	1.232	1.656	0.5095	27.84	4.44444	20.1	6	10	21	0.42
Drought stress	P2×P3	2	7.475	1.474	1.8576	0.529	33.6	9.72222	20.4	9	10.5	24	0.624
Drought stress	P2×P4	2	5.25	1.342	2.0376	0.5275	30.36	7.77778	21.56	5	10.5	26	0.52
Drought stress	P2×P5	2	6.075	1.485	2.4264	0.597	33.84	8.88889	23.56	6	11	26	0.598
Drought stress	P3×P4	2	5.025	1.529	1.656	0.5155	35.4	8.88889	22.45	8	11.5	29	0.56
Drought stress	P3×P5	2	6.8	1.595	2.4912	0.6145	38.16	10.2778	21.4	8	14	30	0.6
Drought stress	P4×P5	2	7.45	1.485	1.8432	0.5185	34.2	11.1111	21.755	6	11	23	0.506
Drought stress	P1	3	6.65	1.54	2.16	0.55	32.04	8.88889	20.27	6	10.5	24	0.48
Drought stress	P2	3	3.825	1.287	1.7136	0.525	26.04	5.55556	24.53	5.5	11	25	0.5
Drought stress	P3	3	6.4	1.496	1.7568	0.55	38.52	7.94444	19.2	8	12	20	0.42
Drought stress	P4	3	5.6	1.397	2.1168	0.5345	30.24	7.77778	21.85	6	12	27	0.567
Drought stress	P5	3	7.75	1.672	3.312	0.65	38.64	11.6667	21.78	7	14	35	0.77
Drought stress	P1×P2	3	5.25	1.43	1.9368	0.535	29.04	7.22222	22.4	6	10.5	25	0.5
Drought stress	P1×P3	3	6.525	1.507	1.9584	0.55	35.28	8.33333	21.03	7	10	20	0.42
Drought stress	P1×P4	3	4.75	1.386	1.728	0.535	30.84	7.77778	21.06	5	10	25	0.5
Drought stress	P1×P5	3	4.45	1.232	1.6128	0.51	27	4.38889	20.03	5.5	9	20	0.44
Drought stress	P2×P3	3	6.725	1.452	1.8288	0.52	32.52	9	18.538	9	10	26	0.598
Drought stress	P2×P4	3	4.7	1.386	1.9152	0.52975	28.44	6.94444	23.19	5	10.5	25	0.5
Drought stress	P2×P5	3	6.175	1.441	2.5128	0.5875	32.4	8.61111	23.16	5.5	12	30	0.6
Drought stress	P3×P4	3	6.1	1.485	1.6416	0.5145	33.6	7.77778	20.6	8	12	25	0.52
Drought stress	P3×P5	3	7.475	1.529	2.5344	0.6	38.64	9.77778	20.49	9.5	14	32	0.64
Drought stress	P4×P5	3	6.75	1.43	1.7424	0.515	33.84	10.3889	21.815	6	11.3	27	0.567
